43. Galli G, Wolpe N, Otten LJ: Sex differences in the use of anticipatory brain activity to encode emotional events. *J Neurosci* 2011; 31:12364–70
44. Weinger MB, Banerjee A, Burden AR, McIvor WR, Boulet J, Cooper JB, Steadman R, Shotwell MS, Slagle JM, DeMaria S Jr, Torsher L, Sinz E, Levine AI, Rask J, Davis F, Park C, Gaba DM: Simulation-based assessment of the management of critical events by board-certified anesthesiologists. *ANESTHESIOLOGY* 2017; 127:475–89
45. Dieckmann P, Krage R: Simulation and psychology: Creating, recognizing and using learning opportunities. *Curr Opin Anaesthesiol* 2013; 26:714–20
46. Rudolph JW, Simon R, Dufresne RL, Raemer DB: There's no such thing as "nonjudgmental" debriefing: A theory and method for debriefing with good judgment. *Simul Healthc* 2006; 1:49–55
47. Morse KJ: Structured model of debriefing on perspective transformation for NP students. *Clinical Simulation in Nursing* 2015; 11:172–9
48. Bong CL, Lightdale JR, Fredette ME, Weinstock P: Effects of simulation *versus* traditional tutorial-based training on physiologic stress levels among clinicians: A pilot study. *Simul Healthc* 2010; 5:272–8
49. Phitayakorn R, Minehart RD, Pian-Smith MC, Hemingway MW, Petrusa ER: Practicality of using galvanic skin response to measure intraoperative physiologic autonomic activation in operating room team members. *Surgery* 2015; 158:1415–20

## ANESTHESIOLOGY REFLECTIONS FROM THE WOOD LIBRARY-MUSEUM

### From Malaysia and Spain: The Liebig Company Peppers the World with Capsaicin

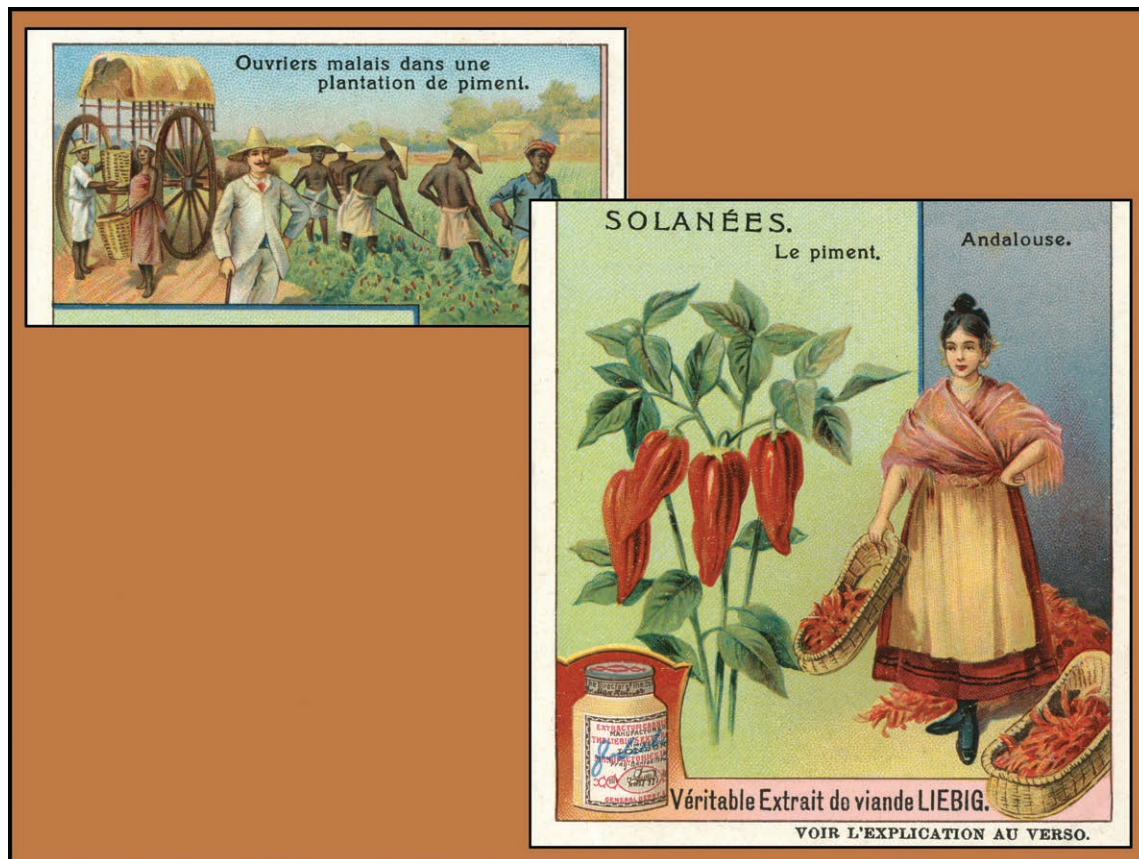

A discoverer of chloroform, Professor Justus von Liebig inspired the Liebig Extract of Beef Company, which collected many herbs and spices, including chili peppers from around the world. One of the company's French-language trade cards depicted Malaysian workers on a spice plantation (*upper left*) and a Spanish lady collecting peppers in her Andalusian basket (*lower right*). Not lost on the Liebig Company was the fact that many early liniments, including snake oils, frequently provided topical pain relief by including capsaicin-spiced ingredients, courtesy of the chili pepper. (Copyright © the American Society of Anesthesiologists' Wood Library-Museum of Anesthesiology.)

George S. Bause, M.D., M.P.H., *Honorary Curator and Laureate of the History of Anesthesia*, Wood Library-Museum of Anesthesiology, Schaumburg, Illinois, and *Clinical Associate Professor*, Case Western Reserve University, Cleveland, Ohio. [UJYC@aol.com](mailto:UJYC@aol.com).
